# Supplementary material for: Improvement of Onsite Wastewater Systems Performance: Experimental and Numerical Investigation
Source: MDPI journal article supplement (doi:10.3390/cleantechnol4030051), 2022-08-24
Supplement: s1 [file s1]

Archive with 1 entries (1 files):
- cleantechnol-1769676-Supplementary File S1.pdf
